# Supplementary material
Source: Springer Nature journal article supplement (https://www.springermedizin.de/resource/supplementary/12968_2012_2645_MOESM2_ESM.pdf/9582400)

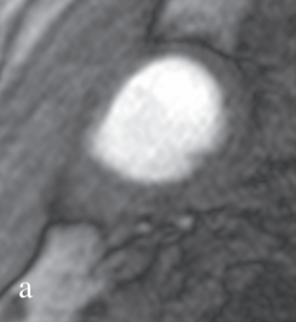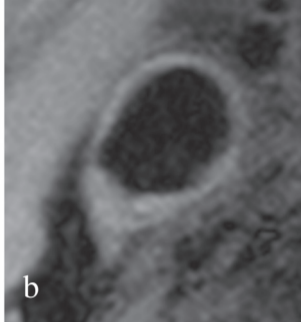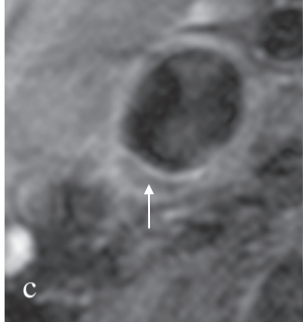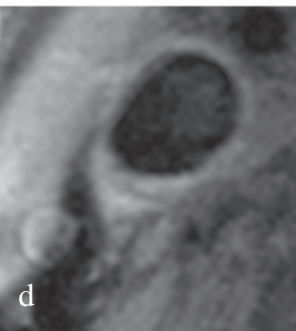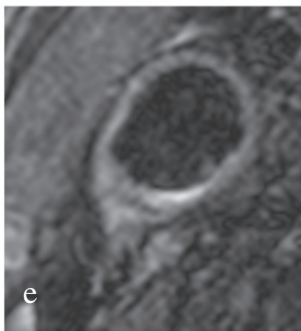

Supplement: MOESM2 [file 9582400]
